# Supplementary material for: Biofunctionalized titanium with anti-fouling resistance by grafting thermo-responsive polymer brushes for the prevention of peri-implantitis
Source: Royal Society of Chemistry journal article supplement (doi:10.1039/c5tb00611b), 2015-01-01
Supplement: c5tb00611b1.pdf [file c5tb00611b1.pdf]

# **Biofunctionalized Titanium with Anti-Fouling Resistance by Grafting of Thermo-Responsive Polymer Brushes for Prevention of Peri-implantitis**

Sang Jin Lee,<sup>‡ac</sup> Dong Nyoung Heo,<sup>‡a</sup> Hak Rae Lee,<sup>b</sup> Donghyun Lee,<sup>a</sup> Seung Jung Yu,<sup>b</sup> Su A  
Park,<sup>c</sup> Wan-Kyu Ko,<sup>a</sup> Se Woong Park,<sup>a</sup> Sung Gap Im,<sup>b</sup> Ji-Hoi Moon<sup>§a</sup> and Il Keun Kwon<sup>§a</sup>

<sup>a</sup> *Department of Maxillofacial Biomedical Engineering and Institute of Oral Biology, School  
of Dentistry, Kyung Hee University, 26 Kyunghee-daero, Dongdaemun-gu, Seoul 130-701,  
Republic of Korea*

<sup>b</sup> *Department of Chemical and Biomolecular Engineering and KI for Nano Century, Korea  
Advanced Institute Science and Technology, Daejeon 305-701, Republic of Korea*

<sup>c</sup> *Department of Nature-Inspired Nanoconvergence Systems, Korea Institute of Machinery and  
Materials, 156 Gajeongbuk-ro, Yuseong-gu, Daejeon 304-343, Republic of Korea*

§ Correspondence to Ji-Hoi Moon, Ph. D.

Department of Maxillofacial Biomedical Engineering and Institute of Oral Biology, School of  
Dentistry, Kyung Hee University, 26 Kyunghee-daero, Dongdaemun-gu, Seoul, 130-701,  
Republic of Korea  
Tel.: 82-2-961-0598

E-mail address: [prudence75@khu.ac.kr](mailto:prudence75@khu.ac.kr) (Ji-Hoi Moon).

§ Correspondence to Il Keun Kwon, Ph. D.

Department of Maxillofacial Biomedical Engineering and Institute of Oral Biology, School of  
Dentistry, Kyung Hee University, 26 Kyunghee-daero, Dongdaemun-gu, Seoul, 130-701,  
Republic of Korea  
Tel.: 82-2-961-0350

E-mail address: [kwoni@khu.ac.kr](mailto:kwoni@khu.ac.kr) (Il Keun Kwon).

‡ These co-authors have made equal contributions to the work.

§ These corresponding authors have made equal contributions to this work.

## Electronic Supplementary Information (ESI)

### Experimental: materials and methods

#### 1. Materials.

Titanium disks (diameter: 12 mm, thickness: 1 mm) were supplied by Biotem Co., Ltd. (Korea). The glycidyl methacrylate (GMA) monomer (97%), *tert*-butyl peroxide (TBPO) initiator (98%), and amine-terminated poly( N-isopropylacrylamide) (Mn = 2500, Sigma-Aldrich) were purchased from Sigma-Aldrich (St. Louis, MO, USA). *Porphyromonas gingivalis* ATCC 33277 (*P. gingivalis*) and *Staphylococcus aureus* ATCC 25923 (*S. aureus*) were obtained from the American Type Culture Collection (Manassas, VA). MesenPRO RS™ medium (MPRO medium) and StemPro® Human ADSCs (adipose derived stem cells) were obtained from Invitrogen (Carlsbad, CA, USA). Fetal bovine serum (FBS), streptomycin, and penicillin were purchased from GIBCO® (Gran Island, NY). All other reagents and solvents were of analytical grade and used without further purification.

#### 2. Preparation of pGMA deposited Ti by iCVD.

The method for iCVD deposition of pGMA has been previously described.<sup>1-4</sup> Briefly, the pGMA polymeric films were deposited on the Ti substrates in a custom-built iCVD chamber (Daeki Hi-Tech Co. Ltd, Korea). The GMA monomer was vaporized and fed into a 35°C heated chamber. An initiator (TBPO) was fed into the chamber without heating and mixed with the GMA monomer in the chamber. The flow rate of the initiator and the GMA monomer were kept at 1.0 sccm and 2.0 sccm, respectively. The deposition process was performed at a filament temperature of 200 °C and a subtracted temperature of 25 °C. The filament temperature was continuously controlled by using a thermocouple directly attached to one of the filaments. The *in situ* growth rate of the pGMA films was monitored using a He-

Ne laser (JDS Uniphase, Milpitas, CA, USA) during the deposition process in order to achieve a predefined thickness of approximately 60 nm.

### 3. Preparation of pGMA deposited Ti surface grafted with PIPAAM.

After deposition of the pGMA films on Ti substrates, amine-terminated PIPAAM was grafted on the Ti surface by using a dip-coating method. Prior to dip-coating, amine-terminated PIPAAM was dissolved in distilled water at a concentration of 1g/30ml at 50 °C. Subsequently, Ti substrates were placed in the PNIPAM solution for 24 hours with agitation. After dip-coating, the PIPAAM coated Ti-substrates were rinsed with distilled water and sterilized by UV light prior to *in vitro* testing.

### 4. Analytical equipment.

Surface observations were measured by a field emission-scanning electron microscope (FE-SEM) using a LEO supra 55, Genesis 2000 (Carl Zeiss, Germany) at an acceleration voltage of 10 kV. Additionally, the surface was observed using Atomic Force Microscopy (AFM, Park-System XE-100, Korea) at a scan area of 10 x 10  $\mu\text{m}^2$  measurements at room temperature. X-ray photoelectron spectroscopy (XPS) was performed using a K-Alpha (Thermo Electron, UK) to confirm the treated surface chemistry. Water contact angle measurements were conducted on a contact angle meter (Phoenix 150, SEO, Korea) using an 8  $\mu\text{l}$  distilled water droplet at room temperature and 50 °C, respectively. Focused ion beam milling was performed using a Helios NanoLab 600 (FEI Company, Netherlands) with energy dispersive X-ray analyzer (EDX, EMAX-7000, Horiba Co. Ltd., Japan). Cellular adhesion on the Ti surface was observed using confocal laser scanning microscopy (CLSM, Eclipse E600W, Nikon, Japan). All analysis were performed in triplicate.

96

97 5. Observation of hADSC cell adhesion on treated Ti surfaces.

98 hADSCs were used to examine cellular adhesion on Ti surfaces. The cell culture procedure  
99 of hADSCs was same as described in our previous research publications.<sup>4-6</sup> hADSCs were  
100 cultured using MesenPRO RS™ medium (MPRO medium, Invitrogen) and the third passage  
101 of ADSCs (Invitrogen) was used. Cell culture was done in an incubator under a humidified  
102 atmosphere with 5% CO<sub>2</sub> at 37°C. MPRO medium was supplemented with MesenPRO RS™  
103 Growth Supplement (2% FBS, 2 mM glutamine). The hADSCs were drop seeded onto  
104 treated Ti surfaces. Briefly, each Ti specimen was placed in a 48 well culture plate and then  
105 60µL of hADSCs, at a density of 5 x 10<sup>3</sup> cells/mL, were drop seeded on top of the Ti surface.  
106 After 2 hours, 940 µL of cell culture medium added to each well. After 1 day of incubation  
107 the cells were washed with 37°C PBS and fixed with 3.9% formaldehyde for 12 hours. After  
108 this, the cells were washed with PBS at 37°C again. The samples were stained with 1 ml of  
109 0.5 wt% of Oregon green 514 phalloidin and 0.1 wt% of DAPI in order to fluorescently label  
110 the cells.

111

112 6. Bacterial binding assay.

113 Prior to bacterial testing, *P. gingivalis* were grown in half-strength brain heart infusion broth  
114 (Difco Laboratories, Detroit, MI) supplemented with 5 µg/ml of hemin and 1 µg/ml of  
115 vitamin K<sub>1</sub> at 37°C under an atmosphere of 85% N<sub>2</sub>, 10% H<sub>2</sub>, and 5% CO<sub>2</sub>. *S. aureus* was  
116 grown in tryptic soy broth (Difco) at 37 °C aerobically. Two identical 24-well plates  
117 containing Ti disks fixed to the bottom of the wells with silicone sealant (Silicone II; GE  
118 Sealants and Adhesives, Huntersville, NC) were prepared. The bacterial binding assay was  
119 performed as described previously with some modifications.<sup>7</sup> Briefly, bacterial cells were

grown to mid-log phase ( $OD_{600} = 0.5$ ) and were harvested by centrifugation. They were subsequently rinsed with 50 mM KCl solution supplemented with 1 mM  $KH_2PO_4$ , 1 mM  $CaCl_2$ , and 0.1 mM  $MgCl_2$  buffered at pH 6 (buffered KCl), and then resuspended in pre-warmed ( $37^\circ C$ ) buffered KCl. The volume of the fresh buffer was equivalent to the volume of the original culture. Aliquots (1 ml) of the bacterial cell suspensions were added to each well of the 24-well plates and then the assay plates were incubated at  $37^\circ C$  for 1 hour. One assay plate was then allowed to stand for 15 min at room temperature, prior to rinsing the Ti disks with room temperature buffered KCl solution to remove non-adherent bacterial cells. The other assay plate was strictly maintained at  $37^\circ C$  while the Ti disks were rinsed with pre-warmed buffered KCl. The number of bacterial cells adherent to Ti-disks was enumerated by ATP-bioluminescence quantification using a BacTiter-Glo<sup>TM</sup> Microbial Cell Viability Assay Kit (Promega, Madison, WI) according to the manufacturer's protocol. In order to characterize the adhesion of bacteria onto the Ti surface using FE-SEM, the bacterial cells adherent to Ti were fixed with 2.5% glutaraldehyde in 0.1 M phosphate buffer for 1 h. Subsequently, they were post fixed with 1%  $OsO_4$  in 0.1 M phosphate buffer for 1 h at  $4^\circ C$ . They were then dehydrated through a graded ethanol series. The samples were finally dried by critical point drying.

## References

1. M. J. Kim, B. Lee, K. Yang, J. Park, S. Jeon, S. H. Um, D. I. Kim, S. G. Im and S. W. Cho, *Biomaterials*, 2013, 34, 7236-7246.
2. B. J. Kang, H. Kim, S. K. Lee, J. Kim, Y. Shen, S. Jung, K. S. Kang, S. G. Im, S. Y. Lee and M. Choi, *Acta biomaterialia*, 2014, 10, 3007-3017.
3. H. J. Park, S. J. Yu, K. Yang, Y. Jin, A. N. Cho, J. Kim, B. Lee, H. S. Yang, S. G. Im and S. W. Cho, *Biomaterials*, 2014, 35, 9811-9823.
4. S. W. Park, D. Lee, H. R. Lee, H. J. Moon, B. R. Lee, W. K. Ko, S.-J. Song, S. J. Lee, K. Shin and W. Jang, *Journal of colloid and interface science*, 2015, 439, 34-41.
5. W. K. Ko, D. N. Heo, H.-J. Moon, S. J. Lee, M. S. Bae, J. B. Lee, I. C. Sun, H. B. Jeon, H. K. Park and I. K. Kwon, *Journal of colloid and interface science*, 2015, 438, 68-76.

6. D. N. Heo, W. K. Ko, M. S. Bae, J. B. Lee, D. W. Lee, W. Byun, C. H. Lee, E.-C. Kim, B.-Y. Jung and I. K. Kwon, *Journal of Materials Chemistry B*, 2014, 2, 1584-1593.
7. J. Lee, H. T. Sojar, G. S. Bedi and R. J. Genco, *Infection and immunity*, 1992, 60, 1662-1670.

|                   | C1s (%) | O1s (%) | N1s (%) | Ti2p (%) |
|-------------------|---------|---------|---------|----------|
| Ti                | 44.57   | 42.14   | 0       | 13.29    |
| Ti + GMA          | 71.26   | 28.74   | 0       | 0        |
| Ti + GMA + PIPAAM | 76.84   | 11.9    | 11.26   | 0        |

**Figure. S1.** Quantification of atomic chemical composition of bare Ti and surface treated Ti.

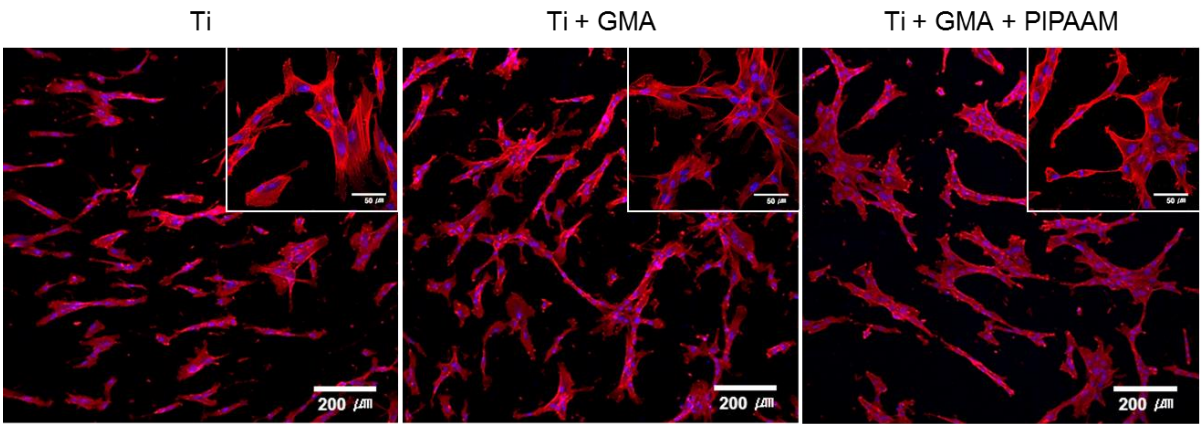

**Figure. S2.** Confocal laser scanning microscope images of bare Ti and surface treated Ti showing adhesion of hADSC on each Ti specimen after 24 h.

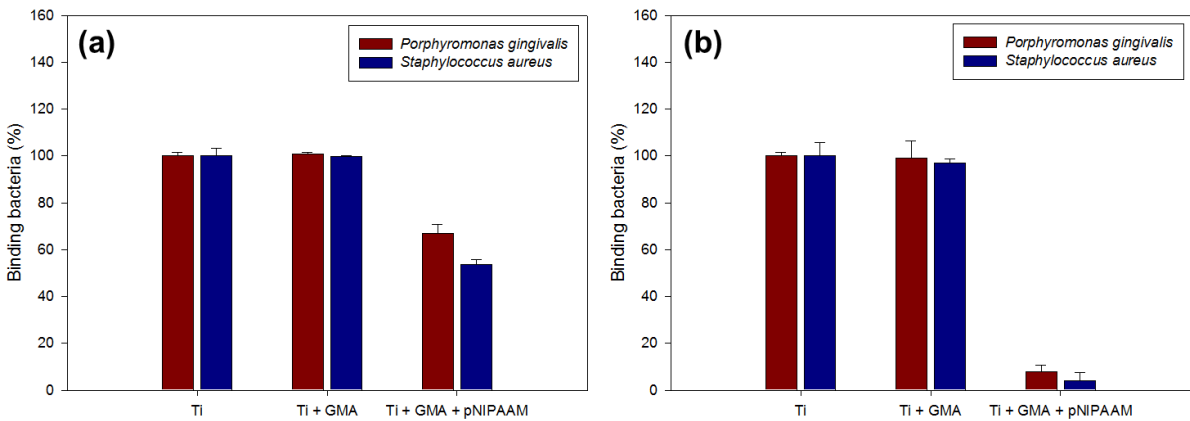

**Figure. S3.** Quantification of bacteria on each specimen after rinsing at oral temperature (a), and after rinsing at room temperature (b). All graphs are relative to pristine Ti.
